# Supplementary material
Source: publisher site journal article supplement (https://www.dovepress.com/article/supplementary_file/615707/615707%20Supplementary%20Material.docx)
Supplement: Supplementary file 1 [file 615707%20Supplementary%20Material.docx]

| **Supplementary Table S1.** Sensitivity analyses of the associations between maternal hyperlipidemia combined with gestational diabetes mellitus and adverse pregnancy outcomes | | | | |
| --- | --- | --- | --- | --- |
| **Outcome** | **Primary analysis aOR**  **(95%CI) #** | **P-value** | **Excluding ART aOR (95%CI) #** | **P-value** |
| PTB (34-36+6weeks) | 1.99 (1.38-2.85) | <0.001 | 1.55 (1.04-2.32) | 0.031 |
| Placenta previa | 0.44 (0.22-0.90) | 0.024 | 0.41 (0.19-0.89) | 0.025 |
| ICP | 1.72 (1.18-2.49) | 0.004 | 1.71 (1.15-2.54) | 0.008 |
| Oligohydramnios | 0.41 (0.21-0.82) | 0.011 | 0.52 (0.26-1.04) | 0.065 |
| LGA | 1.21 (1.03-1.43) | 0.023 | 1.26 (1.05-1.50) | 0.011 |
| Macrosomia | 1.45 (1.12-1.87) | 0.005 | 1.35 (1.03-1.78) | 0.030 |
| Congenital anomalies | 0.33 (0.11-0.93) | 0.036 | 0.34 (0.14-1.45) | 0.089 |
| General neonatal ward admission | 1.23 (1.02-1.49) | 0.033 | 1.17 (0.95-1.43) | 0.132 |

**Abbreviations:** PTB, preterm birth; ICP, intrahepatic cholestasis of pregnancy; LGA, large for gestational age infant

#Adjusted for maternal age, gravidity, parity, pre-pregnancy BMI, gestational weight gain, highest level of education, mode of delivery
